# Supplementary material
Source: PubMed Central journal article supplement (PMC2519225)
Supplement: 01211.2007_1.pdf [file 01211.2007_1.pdf]

Supplementary Table 1. Mean arterial blood pressure (mmHg) at rest and during whisker stimulation in rats

|                           | 1 h     |            | 2 h     |            | 3 h     |            |
|---------------------------|---------|------------|---------|------------|---------|------------|
|                           | Resting | Stimulated | Resting | Stimulated | Resting | Stimulated |
| Time control              | 106±3   | 106±3      | 104±2   | 105±3      | 109±2   | 109±2      |
| Vehicle/HET0016           | 105±2   | 105±2      | 107±2   | 107±2      | 103±2   | 104±3      |
| 7-NI/CSF                  | 95±3    | 95±2       | 94±3    | 95±2       | 95±3    | 95±3       |
| 7-NI/HET0016              | 106±2   | 107±2      | 107±1   | 108±2      | 108±2   | 108±3      |
| ODQ/HET0016               | 93±4    | 93±4       | 92±4    | 93±4       | 92±4    | 92±4       |
| 7-NI + HET0016/14,15-EEZE | 103±2   | 103±2      | 106±2   | 106±2      | 107±2   | 107±2      |
| 7-NI/14,15-EEZE           | 104±2   | 104±2      | 103±2   | 103±2      | 106±3   | 105±3      |

Values are means ± SE. Groups are defined by 2-h treatment/3-h treatment.
