# Supplementary material
Source: PubMed Central journal article supplement (PMC2519225)
Supplement: 01211.2007_2.pdf [file 01211.2007_2.pdf]

Supplementary Table 2. Arterial blood analysis in whisker stimulation experiments in rats

| Group                         | 1 h       | 2 h       | 3 h       |
|-------------------------------|-----------|-----------|-----------|
| <b>pH</b>                     |           |           |           |
| Time control                  | 7.38±0.01 | 7.39±0.01 | 7.39±0.01 |
| Vehicle/HET0016               | 7.38±0.01 | 7.41±0.01 | 7.41±0.01 |
| 7-NI/CSF                      | 7.39±0.01 | 7.39±0.01 | 7.38±0.01 |
| 7-NI/HET0016                  | 7.41±0.01 | 7.40±0.01 | 7.40±0.01 |
| ODQ/HET0016                   | 7.39±0.01 | 7.39±0.01 | 7.38±0.01 |
| 7-NI + HET0016/14,15-EEZE     | 7.39±0.01 | 7.39±0.01 | 7.40±0.01 |
| 7-NI/14,15-EEZE               | 7.39±0.01 | 7.38±0.01 | 7.40±0.01 |
| <b>PCO<sub>2</sub> (Torr)</b> |           |           |           |
| Time control                  | 38±1      | 37±1      | 37±1      |
| Vehicle/HET0016               | 40±1      | 38±1      | 39±1      |
| 7-NI/CSF                      | 39±1      | 39±1      | 39±1      |
| 7-NI/HET0016                  | 38±1      | 37±1      | 37±1      |
| ODQ/HET0016                   | 38±1      | 38±1      | 38±1      |
| 7-NI + HET0016/14,15-EEZE     | 39±1      | 37±1      | 38±1      |
| 7-NI/14,15-EEZE               | 38±1      | 38±1      | 37±1      |
| <b>PO<sub>2</sub> (Torr)</b>  |           |           |           |
| Time control                  | 113±3     | 112±3     | 117±4     |
| Vehicle/HET0016               | 108±4     | 108±5     | 113±3     |
| 7-NI/CSF                      | 116±2     | 118±2     | 118±2     |
| 7-NI/HET0016                  | 113±5     | 112±5     | 116±4     |
| ODQ/HET0016                   | 112±1     | 110±2     | 108±2     |
| 7-NI + HET0016/14,15-EEZE     | 112±2     | 112±4     | 111±2     |
| 7-NI/14,15-EEZE               | 103±3     | 106±3     | 113±4     |
| <b>Hemoglobin (g/dl)</b>      |           |           |           |
| Time control                  | 11.2±0.4  | 11.4±0.3  | 11.3±0.3  |
| Vehicle/HET0016               | 10.5±0.3  | 10.6±0.3  | 11.3±0.3  |
| 7-NI/CSF                      | 12.5±0.6  | 12.1±0.1  | 12.0±0.1  |
| 7-NI/HET0016                  | 11.1±0.4  | 11.3±0.3  | 12.2±0.3  |
| ODQ/HET0016                   | 12.2±0.2  | 11.9±0.1  | 12.1±0.1  |
| 7-NI + HET0016/14,15-EEZE     | 11.3±0.3  | 11.1±0.4  | 11.3±0.3  |
| 7-NI/14,15-EEZE               | 10.8±0.3  | 11.2±0.4  | 11.0±0.3  |

Values are means ± SE. Groups are defined by 2-h treatment/3-h treatment.
