# Supplementary material
Source: PubMed Central journal article supplement (PMC2519225)
Supplement: 01211.2007_3.pdf [file 01211.2007_3.pdf]

Supplementary Table 3. Arterial blood analysis and blood pressure at start and end of experiments in mice

| Group                                      | Start     | End       |
|--------------------------------------------|-----------|-----------|
| <b>pH</b>                                  |           |           |
| C57Bl/6 HET0016                            | 7.38±0.01 | 7.36±0.02 |
| nNOS <sup>-/-</sup> HET0016                | 7.33±0.02 | 7.31±0.03 |
| C57Bl/6 L-NNA                              | 7.38±0.01 | 7.36±0.01 |
| C57Bl/6 L-NNA + HET0016                    | 7.38±0.01 | 7.35±0.01 |
| <b>PCO<sub>2</sub> (Torr)</b>              |           |           |
| C57Bl/6 HET0016                            | 34±1      | 38±1      |
| nNOS <sup>-/-</sup> HET0016                | 32±1      | 34±1      |
| C57Bl/6 L-NNA                              | 34±1      | 36±1      |
| C57Bl/6 L-NNA + HET0016                    | 35±1      | 37±1      |
| <b>PO<sub>2</sub> (Torr)</b>               |           |           |
| C57Bl/6 HET0016                            | 155±6     | 129±5     |
| nNOS <sup>-/-</sup> HET0016                | 148±6     | 127±10    |
| C57Bl/6 L-NNA                              | 151±8     | 137±6     |
| C57Bl/6 L-NNA + HET0016                    | 144±6     | 127±7     |
| <b>Mean arterial blood pressure (mmHg)</b> |           |           |
| C57Bl/6 HET0016                            | 86±3      | 79±3      |
| nNOS <sup>-/-</sup> HET0016                | 92±3      | 99±5      |
| C57Bl/6 L-NNA                              | 79±3      | 77±3      |
| C57Bl/6 L-NNA + HET0016                    | 86±4      | 82±5      |

Values are means ± SE. Groups are defined by treatment at 2 h.
